# Supplementary material
Source: PubMed Central journal article supplement (PMC6694398)
Supplement: jamasurg-154-1014-s001.pdf [file jamasurg-154-1014-s001.pdf]

## Supplementary Online Content

Hyer JM, Ejaz A, Tsilimigras DI, Paredes AZ, Mehta R, Pawlik TM. Novel machine learning approach to identify preoperative risk factors associated with super-utilization of Medicare expenditure following surgery. *JAMA Surg*. Published online August 14, 2019. 10.1001/jamasurg.2019.2979

**eTable 1.** Charlson and Elixhauser Comorbidities in the Crude Population and the Propensity-Matched Population

**eTable 2.** Patient Demographics and Pre-Operative Characteristics for Low- and Super-Utilizers in the Crude Population and the Propensity-Matched Population

This supplementary material has been provided by the authors to give readers additional information about their work.

**eTable 1.** Charlson and Elixhauser Comorbidities in the Crude Population and the Propensity-Matched Population

|                                          | Crude Population              |                |             | Propensity-Matched Population |                |             |
|------------------------------------------|-------------------------------|----------------|-------------|-------------------------------|----------------|-------------|
|                                          | Low Utilizer                  | Super Utilizer | Effect Size | Low Utilizer                  | Super Utilizer | Effect Size |
|                                          | <b>Charlson Comorbidities</b> |                |             |                               |                |             |
| COPD                                     | 124,591 (22.8%)               | 49,722 (62.4%) | 0.294       | 14,337 (40.4%)                | 8,447 (48.3%)  | 0.075       |
| CHF                                      | 39,537 (7.2%)                 | 51,037 (64%)   | 0.538       | 7,574 (21.3%)                 | 6,316 (36.1%)  | 0.158       |
| Leukemia/Lymphoma/ Localized Solid Tumor | 94,099 (17.2%)                | 26,249 (32.9%) | 0.175       | 14,777 (41.6%)                | 6,304 (36.0%)  | 0.051       |
| CKD                                      | 57,496 (10.5%)                | 42,646 (53.5%) | 0.391       | 8,133 (22.9%)                 | 5,628 (32.2%)  | 0.099       |
| Metastatic Solid Tumor                   | 13,212 (2.4%)                 | 9,829 (12.3%)  | 0.133       | 6,401 (18%)                   | 2,444 (14.0%)  | 0.054       |
| Mild Liver Disease                       | 25,552 (4.7%)                 | 12,687 (15.9%) | 0.156       | 4,504 (12.7%)                 | 2,025 (11.6%)  | 0.016       |
| DM                                       | 17,082 (3.1%)                 | 16,374 (20.5%) | 0.258       | 2,376 (6.7%)                  | 1,989 (11.4%)  | 0.080       |
| CTD                                      | 31,916 (5.8%)                 | 7,022 (8.8%)   | 0.041       | 2,858 (8.1%)                  | 1,758 (10.1%)  | 0.033       |
| Hemi- or Para-plegia                     | 1,747 (0.3%)                  | 5,577 (7%)     | 0.207       | 368 (1%)                      | 994 (5.7%)     | 0.138       |
| Dementia                                 | 4,765 (0.9%)                  | 4,014 (5%)     | 0.118       | 897 (2.5%)                    | 682 (3.9%)     | 0.038       |
| Severe Liver Disease                     | 1,131 (0.2%)                  | 1,906 (2.4%)   | 0.105       | 425 (1.2%)                    | 154 (0.9%)     | 0.014       |
| AIDS                                     | 142 (0.0%)                    | 111 (0.1%)     | 0.019       | 28 (0.1%)                     | 18 (0.1%)      | 0.004       |
|                                          | <b>Elixhauser</b>             |                |             |                               |                |             |
| Uncomplicated HTN                        | 354,665 (64.8%)               | 38,916 (48.8%) | 0.111       | 22,010 (62.0%)                | 10,750 (61.5%) | 0.005       |

|                                 |                    |                   |       |               |               |       |
|---------------------------------|--------------------|-------------------|-------|---------------|---------------|-------|
| Cardiac Arrhythmia              | 87,303 (16%)       | 42,189<br>(52.9%) | 0.304 | 9,663 (27.2%) | 5,403 (30.9%) | 0.038 |
| Fluid & Electrolyte Disorders   | 54,038 (9.9%)      | 36,973<br>(46.4%) | 0.345 | 6,509 (18.3%) | 4,187 (23.9%) | 0.066 |
| Hypothyroidism                  | 105,419<br>(19.3%) | 13,249<br>(16.6%) | 0.023 | 6,707 (18.9%) | 3,306 (18.9%) | 0.000 |
| Obesity                         | 84,140 (15.4%)     | 14,077<br>(17.7%) | 0.021 | 5,871 (16.5%) | 2,898 (16.6%) | 0.000 |
| Renal Failure                   | 35,447 (6.5%)      | 24,600<br>(30.8%) | 0.276 | 5,016 (14.1%) | 2,635 (15.1%) | 0.013 |
| Complicated HTN                 | 35,120 (6.4%)      | 23,596<br>(29.6%) | 0.265 | 4,904 (13.8%) | 2,559 (14.6%) | 0.011 |
| Peripheral Vascular Disorders   | 23,753 (4.3%)      | 19,999<br>(25.1%) | 0.271 | 3,900 (11.0%) | 2,319 (13.3%) | 0.033 |
| Valvular Disease                | 27,918 (5.1%)      | 20,642<br>(25.9%) | 0.259 | 2,751 (7.7%)  | 1,953 (11.2%) | 0.056 |
| Metastatic Cancer               | 7,185 (1.3%)       | 4,915 (6.2%)      | 0.117 | 4,095 (11.5%) | 1,240 (7.1%)  | 0.069 |
| Weight Loss                     | 3,872 (0.7%)       | 13,954<br>(17.5%) | 0.337 | 1,081 (3.0%)  | 1,081 (6.2%)  | 0.075 |
| Rheumatoid Arthritis            | 22,758 (4.2%)      | 4,240 (5.3%)      | 0.019 | 1,975 (5.6%)  | 1,078 (6.2%)  | 0.012 |
| Coagulopathy                    | 11,980 (2.2%)      | 14,897<br>(18.7%) | 0.271 | 1,586 (4.5%)  | 1,029 (5.9%)  | 0.031 |
| Other Neurologic Disorders      | 9,969 (1.8%)       | 9,401<br>(11.8%)  | 0.192 | 986 (2.8%)    | 936 (5.4%)    | 0.065 |
| Pulmonary Circulation Disorders | 5,899 (1.1%)       | 8,074<br>(10.1%)  | 0.204 | 1,092 (3.1%)  | 606 (3.5%)    | 0.010 |
| Drug Abuse                      | 8,178 (1.5%)       | 2,837 (3.6%)      | 0.036 | 1,083 (3.1%)  | 525 (3.0%)    | 0.003 |
| Lymphoma                        | 2,392 (0.4%)       | 1,471 (1.8%)      | 0.060 | 364 (1.0%)    | 407 (2.3%)    | 0.051 |
| Blood Loss Anemia               | 6,552 (1.2%)       | 1,904 (2.4%)      | 0.034 | 803 (2.3%)    | 372 (2.1%)    | 0.004 |

|                                       |               |              |       |                   |            |       |
|---------------------------------------|---------------|--------------|-------|-------------------|------------|-------|
| Liver Disease                         | 5,401 (1.0%)  | 3,690 (4.6%) | 0.101 | 979 (2.8%)        | 311 (1.8%) | 0.030 |
| Alcohol Abuse                         | 4,594 (0.8%)  | 1,914 (2.4%) | 0.051 | 567 (1.6%)        | 284 (1.6%) | 0.001 |
| Drug Abuse                            | 3,235 (0.6%)  | 1,200 (1.5%) | 0.052 | 401 (1.1%)        | 211 (1.2%) | 0.001 |
| Psychoses                             | 2,852 (0.5%)  | 1,039 (1.3%) | 0.033 | 355 (1.0%)        | 207 (1.2%) | 0.008 |
| Peptic Ulcer Disease (excl. bleeding) | 2,608 (0.5%)  | 801 (1%)     | 0.024 | 241 (0.7%)        | 151 (0.9%) | 0.010 |
| Paralysis                             | 375 (0.1%)    | 1,753 (2.2%) | 0.122 | 66 (0.2%)         | 104 (0.6%) | 0.034 |
|                                       |               |              |       | <b>Additional</b> |            |       |
| Fibromyalgia                          | 15,736 (2.9%) | 1,363 (2.7%) | 0.002 | 1,017 (2.9%)      | 630 (3.6%) | 0.020 |

COPD: Chronic Obstructive Pulmonary Disease; CHF: Congestive Heart Failure; CKD: Chronic Kidney Disease; DM: Diabetes Mellitus; AIDS: Autoimmune Deficiency Syndrome; CTD: Connective Tissue Disease; HTN: hypertension.

**eTable 2.** Patient Demographics and Pre-Operative Characteristics for Low- and Super-Utilizers in the Crude Population and the Propensity-Matched Population

| Variable      | Training Cohort     |                            |                             |             | Validation Cohort   |                            |                             |             |
|---------------|---------------------|----------------------------|-----------------------------|-------------|---------------------|----------------------------|-----------------------------|-------------|
|               | Total<br>N = 26,493 | Low Utilizer<br>N = 17,794 | Super Utilizer<br>N = 8,699 | Effect Size | Total<br>N = 26,493 | Low Utilizer<br>N = 17,703 | Super Utilizer<br>N = 8,790 | Effect Size |
| Age           | 74 (69, 79)         | 74 (69, 79)                | 74 (69, 79)                 | -0.004      | 74 (69, 79)         | 74 (69, 79)                | 74 (69, 79)                 | -0.001      |
| Age Category  |                     |                            |                             | 0.027       |                     |                            |                             | 0.029       |
| 65 - 69       | 6,329 (23.9%)       | 4,388 (24.7%)              | 1,941 (22.3%)               |             | 6,407 (24.2%)       | 4,412 (24.9%)              | 1,995 (22.7%)               |             |
| 70 - 74       | 7,218 (27.2%)       | 4,799 (27.0%)              | 2,419 (27.8%)               |             | 7,140 (27.0%)       | 4,694 (26.5%)              | 2,446 (27.8%)               |             |
| 75 - 79       | 6,101 (23.0%)       | 4,026 (22.6%)              | 2,075 (23.9%)               |             | 6,091 (23.0%)       | 3,988 (22.5%)              | 2,103 (23.9%)               |             |
| 80 - 84       | 4,167 (15.7%)       | 2,802 (15.7%)              | 1,365 (15.7%)               |             | 4,164 (15.7%)       | 2,776 (15.7%)              | 1,388 (15.8%)               |             |
| > 84          | 2,678 (10.1%)       | 1,779 (10.0%)              | 899 (10.3%)                 |             | 2,691 (10.2%)       | 1,833 (10.4%)              | 858 (9.8%)                  |             |
| Male          | 12,616 (47.6%)      | 8,415 (47.3%)              | 4,201 (48.3%)               | 0.009       | 12,587 (47.5%)      | 8,343 (47.1%)              | 4,244 (48.3%)               | 0.011       |
| Race          |                     |                            |                             | 0.007       |                     |                            |                             | 0.003       |
| White         | 24,348 (91.9%)      | 16,369 (92.0%)             | 7,979 (91.7%)               |             | 24,379 (92%)        | 16,294 (92.0%)             | 8,085 (92.0%)               |             |
| AA            | 1,460 (5.5%)        | 969 (5.4%)                 | 491 (5.6%)                  |             | 1,466 (5.5%)        | 975 (5.5%)                 | 491 (5.6%)                  |             |
| Hispanic      | 87 (0.3%)           | 61 (0.3%)                  | 26 (0.3%)                   |             | 76 (0.3%)           | 49 (0.3%)                  | 27 (0.3%)                   |             |
| Other/Unknown | 598 (2.3%)          | 395 (2.2%)                 | 203 (2.3%)                  |             | 572 (2.2%)          | 385 (2.2%)                 | 187 (2.1%)                  |             |
| Procedure     |                     |                            |                             | 0.048       |                     |                            |                             | 0.053       |
| Colectomy     | 6486 (24.5%)        | 4,189 (23.5%)              | 2,297 (26.4%)               |             | 6,417 (24.2%)       | 4,186 (23.6%)              | 2,231 (25.4%)               |             |
| AAA           | 1,350 (5.1%)        | 930 (5.2%)                 | 420 (4.8%)                  |             | 1,383 (5.2%)        | 920 (5.2%)                 | 463 (5.3%)                  |             |
| CABG          | 1,073 (4.1%)        | 645 (3.6%)                 | 428 (4.9%)                  |             | 1,002 (3.8%)        | 572 (3.2%)                 | 430 (4.9%)                  |             |
| Hip           | 5,808 (21.9%)       | 3,953 (22.2%)              | 1,855 (21.3%)               |             | 5,919 (22.3%)       | 3,921 (22.1%)              | 1,998 (22.7%)               |             |
| Knee          | 8,713 (32.9%)       | 6,018 (33.8%)              | 2,695 (31.0%)               |             | 8,704 (32.9%)       | 5,961 (33.7%)              | 2,743 (31.2%)               |             |

| Variable            | Training Cohort     |                            |                             |             | Validation Cohort   |                            |                             |             |
|---------------------|---------------------|----------------------------|-----------------------------|-------------|---------------------|----------------------------|-----------------------------|-------------|
|                     | Total<br>N = 26,493 | Low Utilizer<br>N = 17,794 | Super Utilizer<br>N = 8,699 | Effect Size | Total<br>N = 26,493 | Low Utilizer<br>N = 17,703 | Super Utilizer<br>N = 8,790 | Effect Size |
| Lung Resection      | 3,063 (11.6%)       | 2,059 (11.6%)              | 1,004 (11.5%)               |             | 3,068 (11.6%)       | 2,143 (12.1%)              | 925 (10.5%)                 |             |
| Comorbidity Indices |                     |                            |                             |             |                     |                            |                             |             |
| Charlson            | 3 (1, 5)            | 2 (1, 5)                   | 3 (2, 5)                    | -0.010      | 3 (1, 5)            | 3 (1, 5)                   | 3 (1, 5)                    | -0.006      |
| Elixhauser          | 3 (2, 5)            | 3 (2, 4)                   | 3 (2, 5)                    | -0.007      | 3 (2, 5)            | 3 (2, 5)                   | 3 (2, 5)                    | -0.006      |
| CMS-HCC             | 1.31 (0.75, 2.34)   | 1.24 (0.72, 2.25)          | 1.44 (0.86, 2.5)            | -0.008      | 1.32 (0.74, 2.37)   | 1.26 (0.71, 2.31)          | 1.43 (0.82, 2.45)           | -0.006      |

\*: Variable was used in the propensity-matching analysis
